# Supplementary material for: Direct synthesis of a carbon nanotube interpenetrated doped porous carbon alloy as a durable Pt-free electrocatalyst for the oxygen reduction reaction in an alkaline medium
Source: Royal Society of Chemistry journal article supplement (doi:10.1039/c7se00249a), 2017-01-01
Supplement: c7se00249a1.pdf [file c7se00249a1.pdf]

## Supplementary Information

# Direct synthesis of carbon nanotube interpenetrated doped porous carbon alloy as a durable Pt-free electrocatalyst for oxygen reduction reaction in alkaline medium†

Sreekuttan M. Unni <sup>a</sup>, Gopinathan M. Anilkumar <sup>b, d</sup>, Masashi Matsumoto <sup>c, d</sup>, Takanori Tamaki <sup>a, d</sup>, Hideto Imai <sup>c, d</sup> and Takeo Yamaguchi <sup>a, d\*</sup>

a. Laboratory for Chemistry and Life Sciences, Tokyo Institute of Technology, R1-17, 4259 Nagatsuta, Midori-ku, Yokohama 226-850, Japan. Email: [yamag@res.titech.ac.jp](mailto:yamag@res.titech.ac.jp).

b. R&D Centre, Noritake Co., Ltd., 300 Higashiyama, Miyochi-cho, Miyoshi 470-0293, Japan.

c. Device Functional Analysis Department, Nissan Arc, Ltd., Yokosuka, Kanagawa 237-0061, Japan.

d. Core Research for Evolutionary Science and Technology, Japan Science and Technology Agency (JST-CREST), Japan.

Table S1: Atom percentage of different elements in the electrocatalysts calculated from XPS

| Catalyst | Carbon | Nitrogen | Oxygen | Iron | Cobalt | Zinc |
|----------|--------|----------|--------|------|--------|------|
| FeCo-NCZ | 86.55  | 5.65     | 5.46   | 1.29 | 0.96   | 0.08 |
| Fe-NCZ   | 90.47  | 3.32     | 5.14   | 1.07 | 0.00   | 0.00 |
| Co-NCZ   | 85.03  | 5.22     | 7.50   | 0.00 | 2.00   | 0.25 |
| Co-NC    | 90.34  | 2.10     | 5.69   | 0.00 | 1.86   | 0.00 |

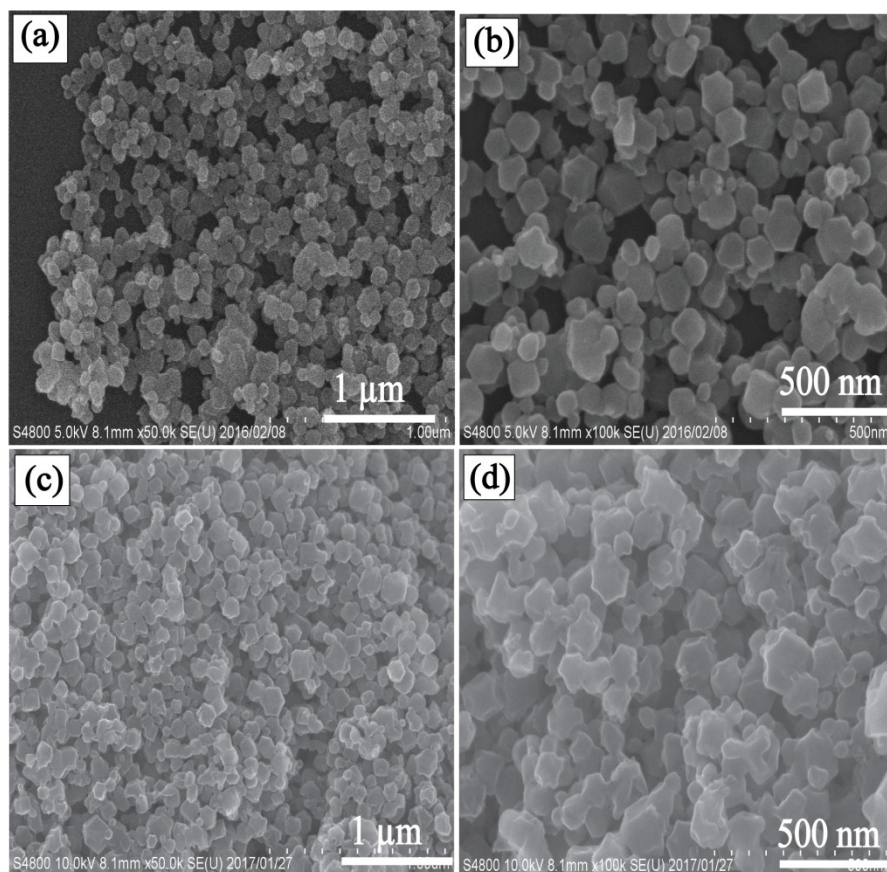

Figure S1. SEM images of (a & b) Co-ZIF at and (c & d) FeCoZn-ZIF at different magnification

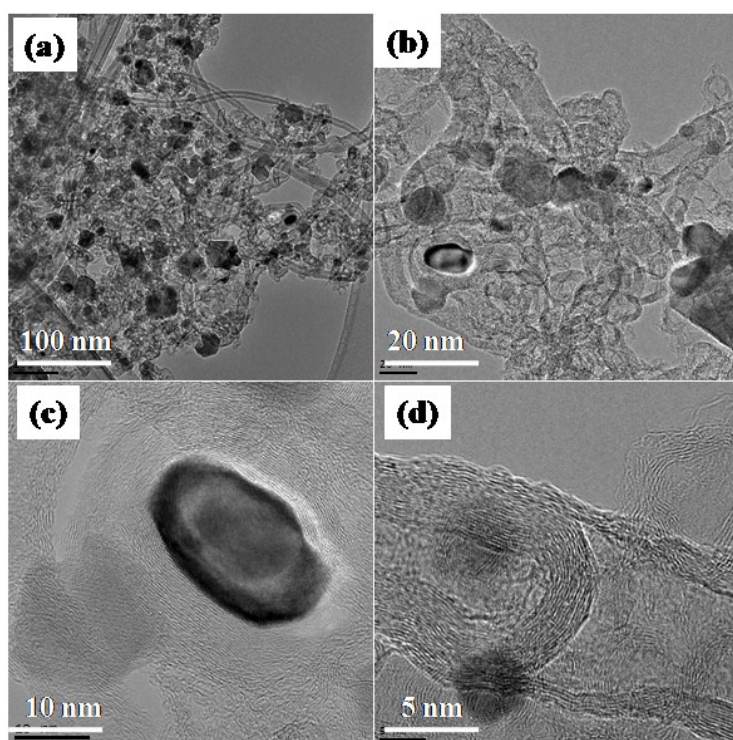

Figure S2. TEM images of Fe-NCZ at different magnifications.

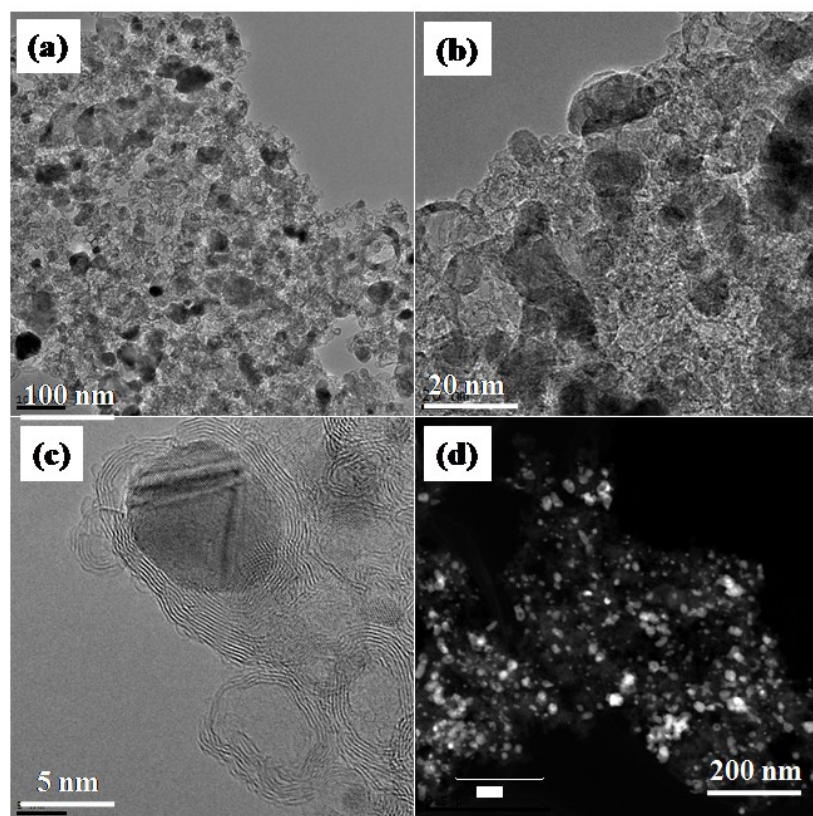

Figure S3. TEM images of Co-NCZ at different magnification.

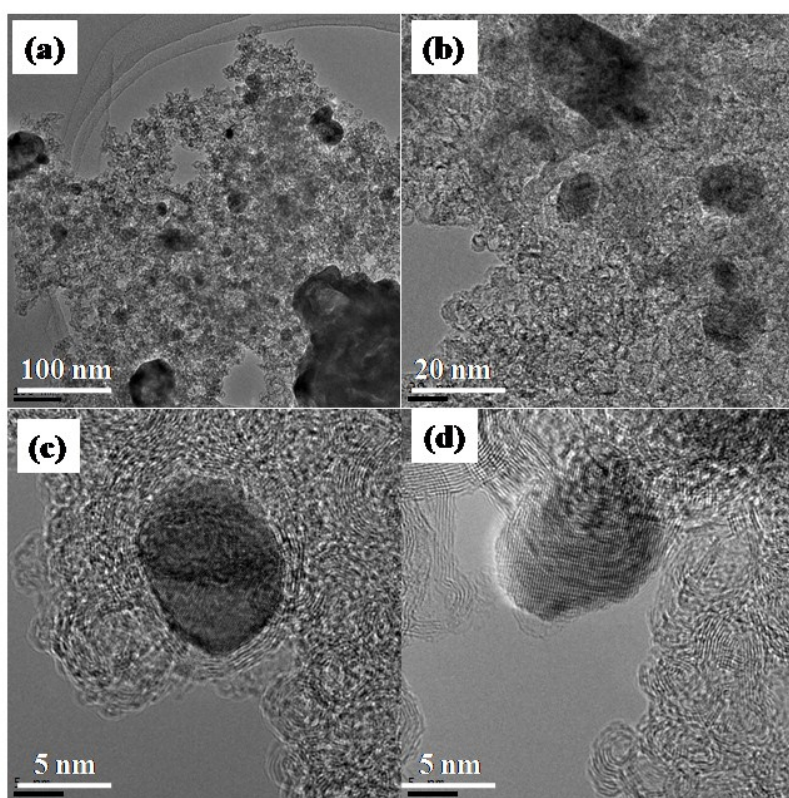

Figure S4. TEM images of Co-NC at different magnifications.



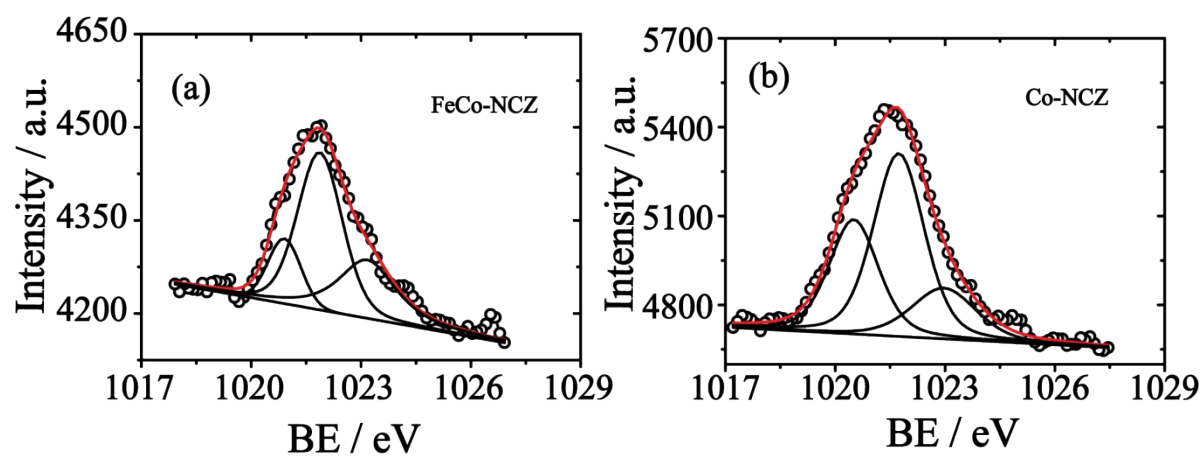

Figure S5. Deconvoluted XPS spectrum of Zn 2p of (a) FeCo-NCZ and (b) Co-NCZ.

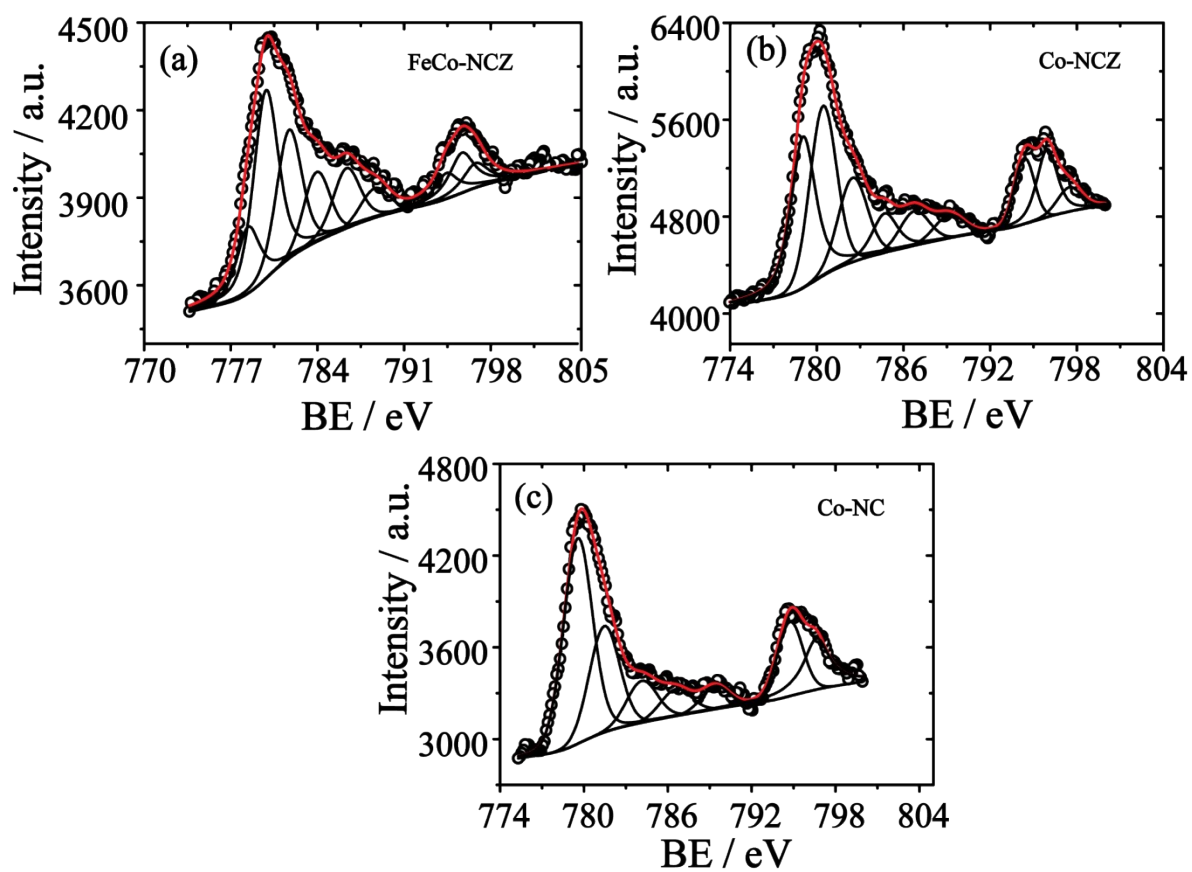

Figure S6. Deconvoluted XPS spectrum of Co 2p of (a) FeCo-NCZ, (b) Co-NCZ, and (c) Co-NC.



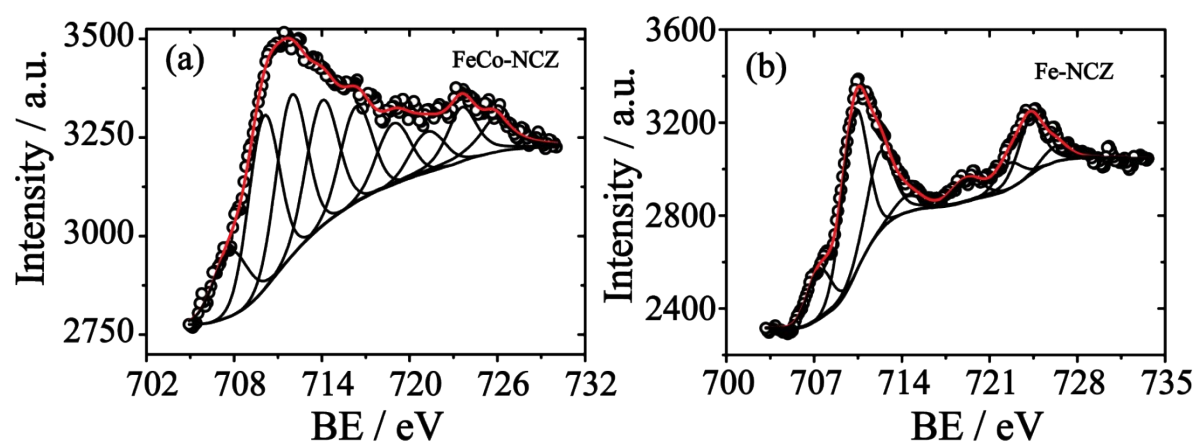

Figure S7. Deconvoluted XPS spectrum of Fe 2p of (a) FeCo-NCZ and (b) Fe-NCZ.

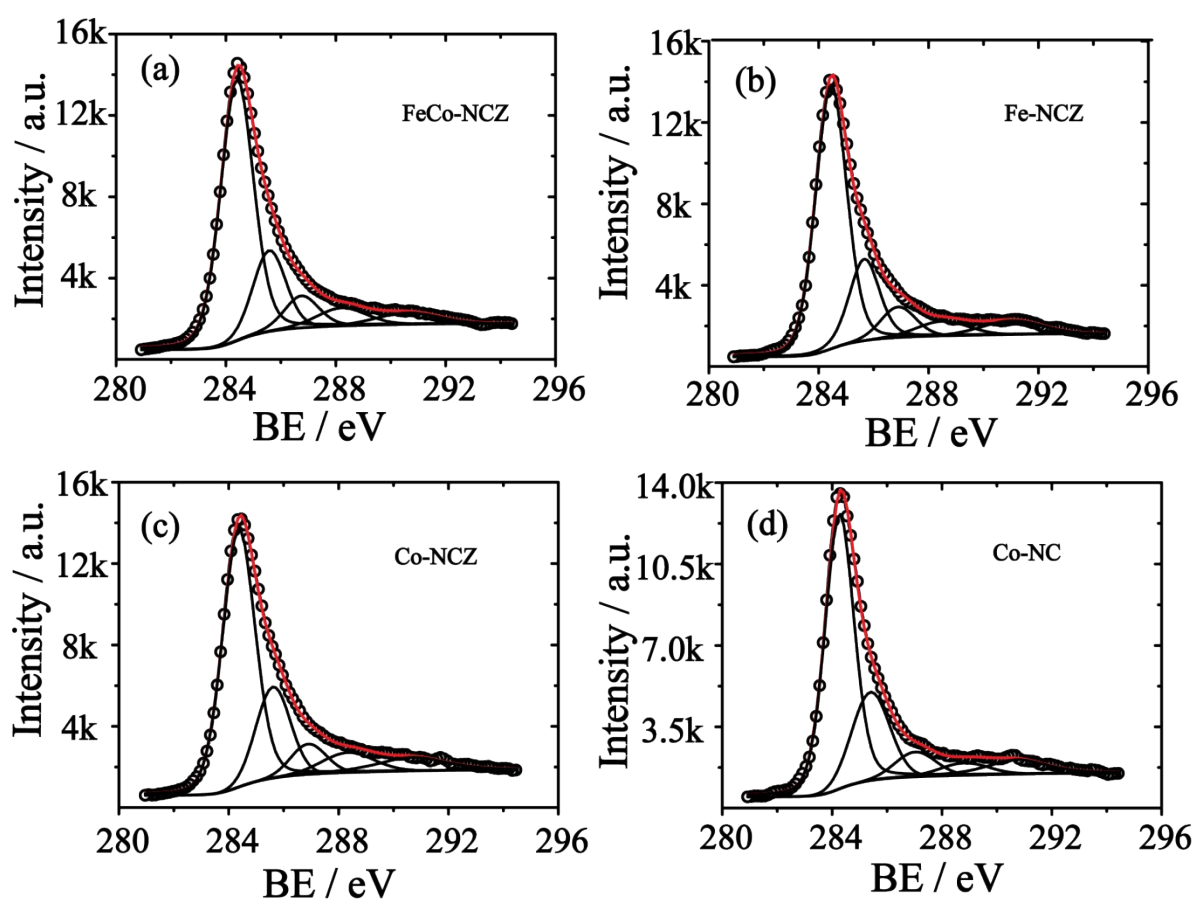

Figure S8. Deconvoluted XPS spectrum of C 1s of (a) FeCo-NCZ, (b) Fe-NCZ, (c) Co-NCZ, and (d) Co-NC.

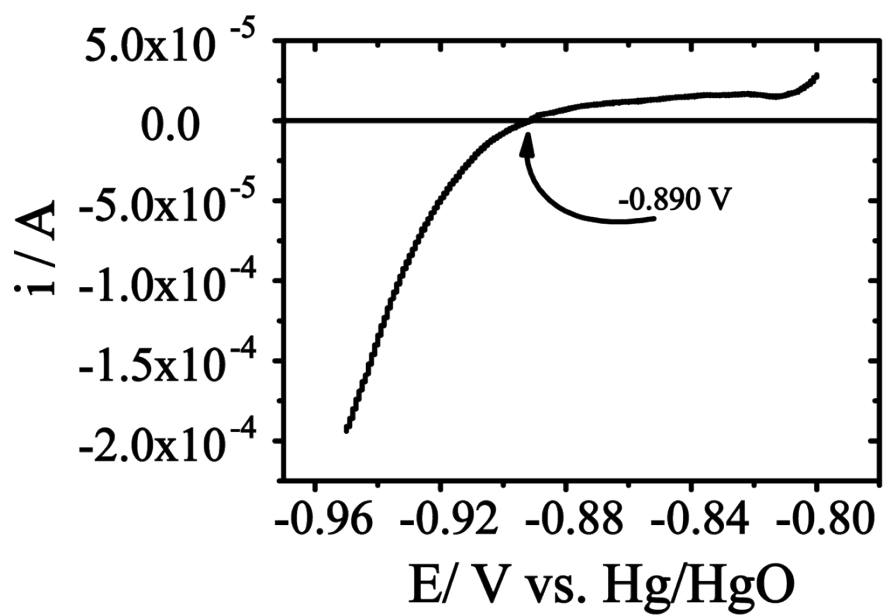

Figure S9. Calibration of Hg/HgO reference electrode. Linear sweep voltammogram (LSV) of Pt disc in hydrogen saturated 0.1 M KOH at a scan rate of  $1 \text{ mV s}^{-1}$ . The electrode potential was converted to RHE using formula,  $E_{\text{RHE}} = E_{\text{Hg/HgO}} + 890$ .

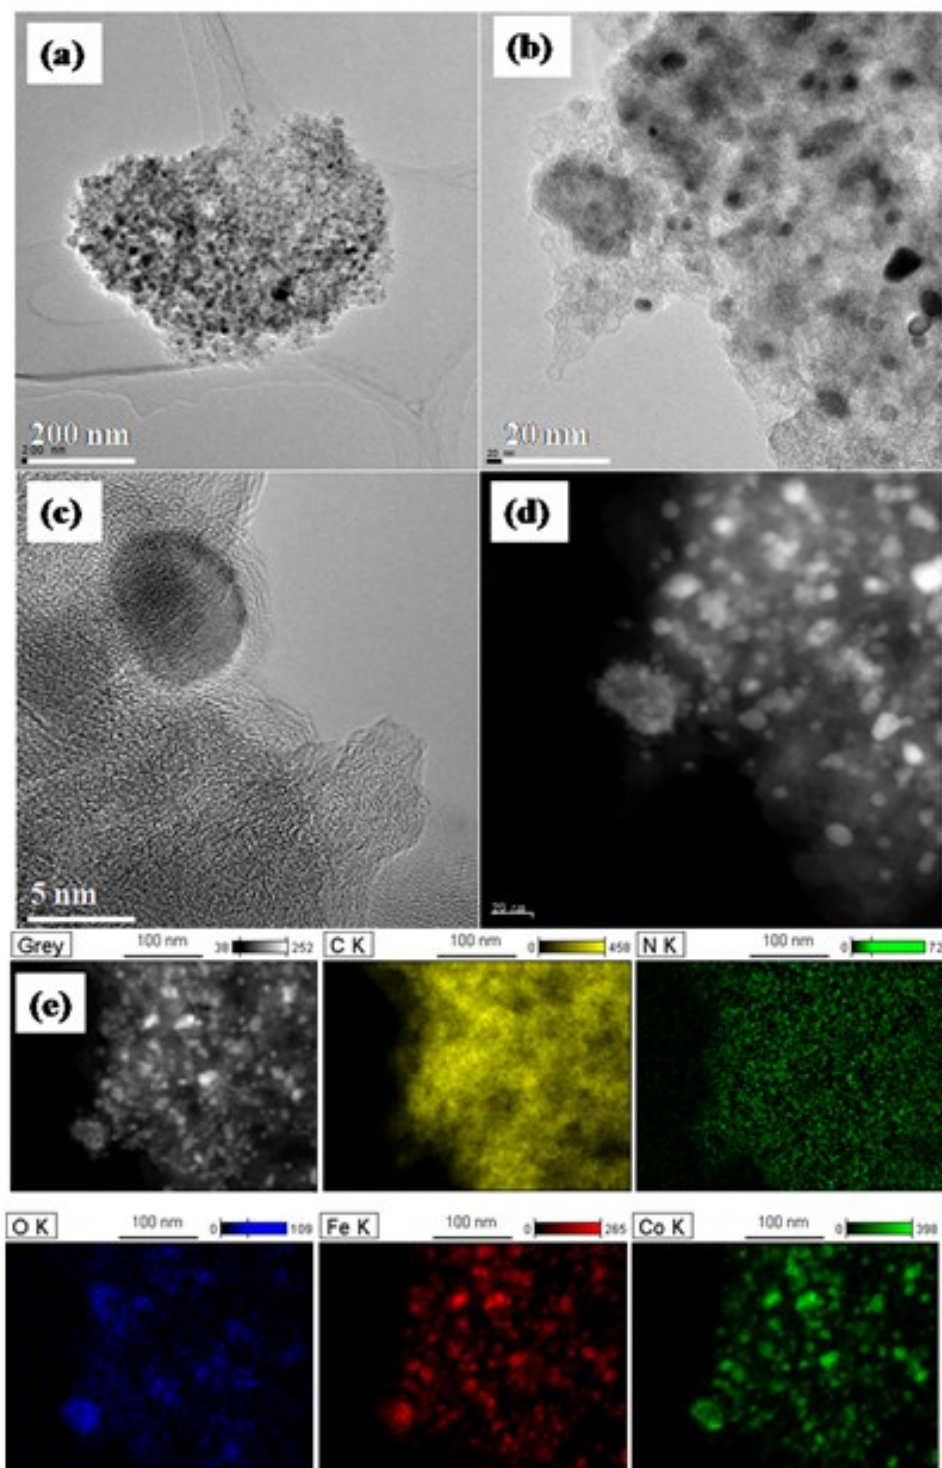

Figure S10. TEM images of FeCo-NCZ at different magnifications ((a) 200 nm, (b) 20 nm, and (c) 5 nm) after durability study. (d) STEM image of FeCo-NCZ and (e) represent the elemental mapping of FeCo-NCZ after durability study.

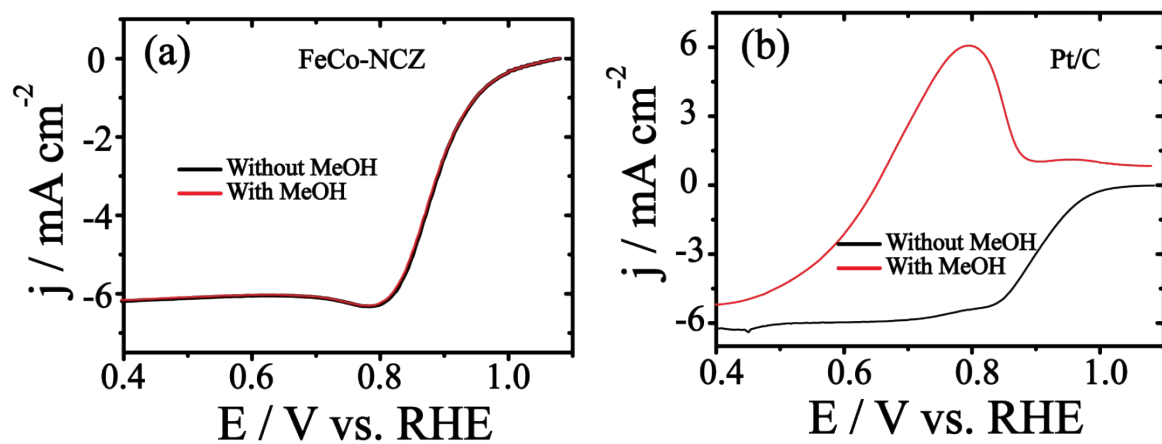

Figure 11. Linear sweep voltammogram (LSV) of (a) FeCo-NCZ and (b) Pt/C in oxygen saturated 0.1 M KOH with/without methanol (0.16 M) at an electrode rotation of 1600 rpm with a scan rate of  $10 \text{ mV s}^{-1}$ .
